# Supplementary material for: Differential var gene expression in the organs of patients dying of falciparum malaria
Source: PubMed Central journal article supplement (PMC2170262; doi:10.1111/j.1365-2958.2007.05837.x), 2007-08
Supplement: mmi0065-0959-SD1.pdf [file mmi0065-0959-SD1.pdf]

**BRAIN**

**LUNG**

**HEART**

**SPLEEN**

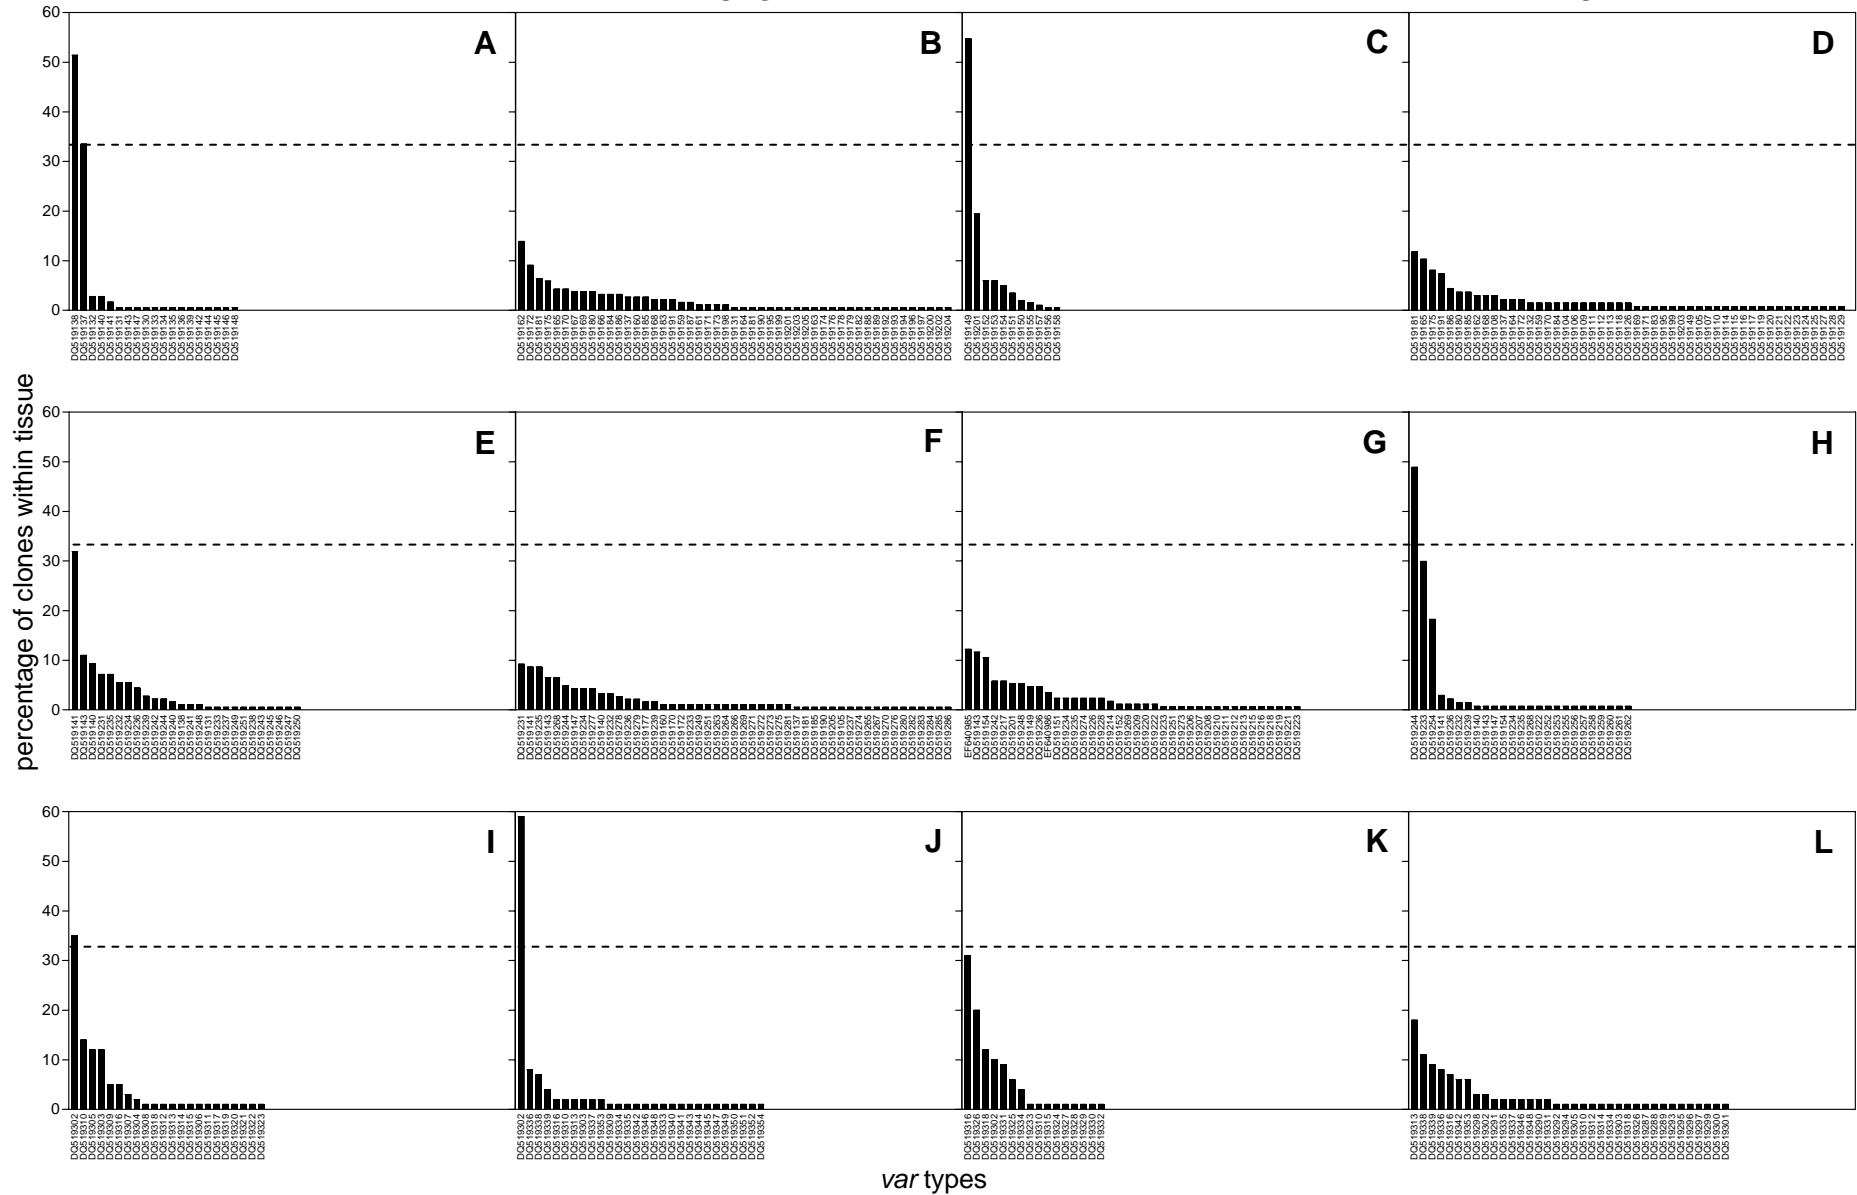

var types

Figure S1. Frequency of cloning of individual *var* types within the organs of Malawian paediatric malaria patients PM 30 (A-D), PM 32 (E-H) and PM 55 (I-L). *Var* types are listed in order of decreasing frequency of cloning within each tissue and are identified by accession number. The dashed line indicates 33% frequency of cloning, the cut-off point for dominance of 1-2 *var* types.
